# Supplementary material for: Efficient and rapid linker optimization with heterodimeric coiled coils improves the response of fluorescent biosensors comprising antibodies and protein M
Source: Royal Society of Chemistry journal article supplement (doi:10.1039/d3an01499a), 2023-01-01
Supplement: d3an01499a1.pdf [file d3an01499a1.pdf]

**Electronic Supplementary information for**

**Efficient and rapid linker optimization with heterodimeric coiled coils improves the response of fluorescent biosensors comprising antibody and protein M**

Kana Sasamoto,<sup>a</sup> Takanobu Yasuda,<sup>b</sup> Bo Zhu,<sup>b</sup> Hiroshi Ueda<sup>b</sup> and Tetsuya Kitaguchi\*<sup>b</sup>

*<sup>a</sup>School of Life Science and Technology, Department of Life Science and Technology, Tokyo Institute of Technology, 4259 Nagatsuta-cho, Midori-ku, Yokohama, Kanagawa, 226-8501, Japan*

*<sup>b</sup>Laboratory for Chemistry and Life Science, Institute of Innovative Research, Tokyo Institute of Technology, 4259 Nagatsuta-cho, Midori-ku, Yokohama, Kanagawa, 226-8503, Japan*

\*Correspondence

E-mail: kitaguc.t.aa@m.titech.ac.jp

Laboratory for Chemistry and Life Science, Institute of Innovative Research, Tokyo Institute of Technology, Nagatsuta-cho, Midori-ku, Yokohama 226-8503, Japan

## Supplementary Table

**Table S1. The DNA sequence of the primers used for the construction of PM-E4s.**

| Primer name        | Nucleotide Sequence (5'-3')                        |
|--------------------|----------------------------------------------------|
| Bsu_SMA_E4back     | AAACGTGCGGCCTCAATGGCTGAAATCGCTGCAC                 |
| Bsu_SGGGSMA_E4back | AAACGTGCGGCCTCAGGTGGAGGGAGCATGGCTGAAATCGCTGCAC     |
| Bsu_SGS_E4back     | AAACGTGCGGCCTCAGGGTCTGAAATCGCTGCAC                 |
| Bsu_SGGSGG_E4back  | AAACGTGCGGCCTCAGGTGGAGGGAGCGGGGTGAAATCGCTGCAC      |
| E4-2_Bottom        | ACTTTAGCGACGTGACCTCTTTCTTTAACGTCGGAATCTTTTCTTTATCG |
| E4-3_Top           | CCTTAGAAAAAGAAATAGCAGCGTTGGAAAAGGAAATCGCAGCATTGGAG |
| Eag_E4For_v2       | CCTTTAGCGTCGTAACCTCTCATTATTGCCGGCGTGAGCTCGT        |

**Table S2. Amino acid sequences of peptides for antigen and K4s before dye modification.**

| Peptide name | Sequence                                                                   | M.W.   |
|--------------|----------------------------------------------------------------------------|--------|
| BGP-C7       | NH <sub>2</sub> -RRFYGPV-COOH                                              | 894.0  |
| C-K4         | NH <sub>2</sub> -C KIAALKEKIAALKEKIAALKEKIAALKE-COOH                       | 3136.9 |
| C-G3S-K4     | NH <sub>2</sub> -C GGGG KIAALKEKIAALKEKIAALKEKIAALKE-COOH                  | 3395.1 |
| C-G3SG3S-K4  | NH <sub>2</sub> -C GGGSGGGG KIAALKEKIAALKEKIAALKEKIAALKE-CONH <sub>2</sub> | 3637.0 |

### A Anti-BGP Fab

|              |          | T-K4 linker         |                     |                     |
|--------------|----------|---------------------|---------------------|---------------------|
|              |          | (GGGS) <sub>0</sub> | (GGGS) <sub>1</sub> | (GGGS) <sub>2</sub> |
| PM-E4 linker | SMA      | 0.79 ± 0.017        | 0.81 ± 0.0087       | 0.62 ± 0.017        |
|              | SGS      | 0.72 ± 0.020        | 0.35 ± 0.018        | 0.38 ± 0.020        |
|              | SGGG SMA | 0.43 ± 0.017        | 0.23 ± 0.0079       | 0.16 ± 0.0014       |
|              | SGGG SGG | 0.84 ± 0.031        | 0.23 ± 0.0073       | 0.28 ± 0.027        |

### B Anti-CS IgG

|              |          | T-K4 linker         |                     |                     |
|--------------|----------|---------------------|---------------------|---------------------|
|              |          | (GGGS) <sub>0</sub> | (GGGS) <sub>1</sub> | (GGGS) <sub>2</sub> |
| PM-E4 linker | SMA      | 0.79 ± 0.0041       | 0.72 ± 0.027        | 0.58 ± 0.017        |
|              | SGS      | 0.48 ± 0.0093       | 0.54 ± 0.024        | 0.53 ± 0.023        |
|              | SGGG SMA | 0.38 ± 0.012        | 0.49 ± 0.0091       | 0.50 ± 0.019        |
|              | SGGG SGG | 0.41 ± 0.0079       | 0.44 ± 0.0044       | 0.45 ± 0.023        |

### C Anti-TS IgG

|              |          | T-K4 linker         |                     |                     |
|--------------|----------|---------------------|---------------------|---------------------|
|              |          | (GGGS) <sub>0</sub> | (GGGS) <sub>1</sub> | (GGGS) <sub>2</sub> |
| PM-E4 linker | SMA      | 0.79 ± 0.028        | 0.91 ± 0.038        | 0.81 ± 0.014        |
|              | SGS      | 0.58 ± 0.012        | 0.62 ± 0.0070       | 0.69 ± 0.023        |
|              | SGGG SMA | 0.55 ± 0.031        | 0.54 ± 0.028        | 0.59 ± 0.017        |
|              | SGGG SGG | 0.53 ± 0.016        | 0.55 ± 0.012        | 0.56 ± 0.013        |

### D Anti-Digoxin IgG

|              |          | T-K4 linker         |                     |                     |
|--------------|----------|---------------------|---------------------|---------------------|
|              |          | (GGGS) <sub>0</sub> | (GGGS) <sub>1</sub> | (GGGS) <sub>2</sub> |
| PM-E4 linker | SMA      | 1.2 ± 0.076         | 1.1 ± 0.074         | 1.0 ± 0.033         |
|              | SGS      | 0.94 ± 0.051        | 1.0 ± 0.022         | 1.0 ± 0.0058        |
|              | SGGG SMA | 0.80 ± 0.012        | 0.82 ± 0.020        | 0.92 ± 0.015        |
|              | SGGG SGG | 0.77 ± 0.070        | 0.97 ± 0.014        | 0.92 ± 0.027        |

**Table S3.** Quenching levels of 12 combinations of CQ-probe using TAMRA with different linkers mixed with anti-BGP Fab (50 nM), anti-CS IgG (5.0 nM), anti-TS IgG (5.0 nM), and anti-digoxin IgG (10 nM). CQ-probe concentration in all experiments was 1.0 nM. The data represent means ± standard deviation (n = 3).

A BGP-C7

| PM-E4 linker / T-K4 linker    | + Anti-BGP Fab (30 nM) | + BGP-C7 (3.0 $\mu$ M) | Response |
|-------------------------------|------------------------|------------------------|----------|
| SGGGSMA/ (GGGS) <sub>2</sub>  | 0.25 $\pm$ 0.011       | 0.95 $\pm$ 0.030       | 3.7      |
| SGGGS GG/ (GGGS) <sub>1</sub> | 0.20 $\pm$ 0.017       | 0.88 $\pm$ 0.033       | 4.3      |

B CS

| PM-E4 linker / T-K4 linker    | + Anti-CS IgG (5.0 nM) | + CS (1.0 mM)     | Response |
|-------------------------------|------------------------|-------------------|----------|
| SGGGSMA/ (GGGS) <sub>0</sub>  | 0.41 $\pm$ 0.021       | 1.1 $\pm$ 0.062   | 2.6      |
| SGGGS GG/ (GGGS) <sub>0</sub> | 0.42 $\pm$ 0.015       | 0.90 $\pm$ 0.0059 | 2.1      |

C TS

| PM-E4 linker / T-K4 linker    | + Anti-TS IgG (5.0 nM) | + TS (1.0 $\mu$ M) | Response |
|-------------------------------|------------------------|--------------------|----------|
| SGGGSMA/ (GGGS) <sub>0</sub>  | 0.55 $\pm$ 0.013       | 1.1 $\pm$ 0.016    | 1.9      |
| SGGGSMA/ (GGGS) <sub>1</sub>  | 0.53 $\pm$ 0.0088      | 1.0 $\pm$ 0.018    | 1.9      |
| SGGGS GG/ (GGGS) <sub>0</sub> | 0.55 $\pm$ 0.013       | 0.99 $\pm$ 0.065   | 1.8      |
| SGGGS GG/ (GGGS) <sub>1</sub> | 0.52 $\pm$ 0.025       | 0.93 $\pm$ 0.0035  | 1.8      |

D Digoxin

| PM-E4 linker / T-K4 linker    | + Anti-digoxin IgG (10 nM) | + Digoxin (1.0 $\mu$ M) | Response |
|-------------------------------|----------------------------|-------------------------|----------|
| SGGGSMA/ (GGGS) <sub>0</sub>  | 0.80 $\pm$ 0.012           | 0.93 $\pm$ 0.028        | 1.2      |
| SGGGS GG/ (GGGS) <sub>0</sub> | 0.77 $\pm$ 0.043           | 1.0 $\pm$ 0.045         | 1.3      |

**Table S4.** Fluorescence responses for selected T-K4 labeled CQ-probes/antibody complex against BGP-C7, cortisol, testosterone, and digoxin. The data represent the means  $\pm$  standard deviation (n = 3).

### A BGP-C7

|                    | Max response (-fold) | $\Delta$ F.I. (%) | $\frac{\Delta$ F.I.CQ-probe / $\Delta$ F.I.PM Q-probe | EC50 (nM) | LOD (nM) |
|--------------------|----------------------|-------------------|-------------------------------------------------------|-----------|----------|
| CQ-probe (TAMRA)   | 4.6                  | 360               | 2.6                                                   | 140       | 18       |
| PM Q-probe (TAMRA) | 2.4                  | 140               |                                                       | 85        | 27       |
| CQ-probe (R6G)     | 8.9                  | 790               | 13                                                    | 520       | 11       |
| PM Q-probe (R6G)   | 1.6                  | 61                |                                                       | 260       | 15       |

### B CS

|                    | Max response (-fold) | $\Delta$ F.I. (%) | $\frac{\Delta$ F.I.CQ-probe / $\Delta$ F.I.PM Q-probe | EC50 (nM) | LOD (nM) |
|--------------------|----------------------|-------------------|-------------------------------------------------------|-----------|----------|
| CQ-probe (TAMRA)   | 2.5                  | 150               | 1.5                                                   | 3.9       | 0.25     |
| PM Q-probe (TAMRA) | 2.0                  | 100               |                                                       | 7.1       | 0.34     |
| CQ-probe (R6G)     | 4.7                  | 370               | 9.7                                                   | 210       | 1.6      |
| PM Q-probe (R6G)   | 1.4                  | 38                |                                                       | 170       | 15       |

### C TS

|                    | Max response (-fold) | $\Delta$ F.I. (%) | $\frac{\Delta$ F.I.CQ-probe / $\Delta$ F.I.PM Q-probe | EC50 (nM) | LOD (nM) |
|--------------------|----------------------|-------------------|-------------------------------------------------------|-----------|----------|
| CQ-probe (TAMRA)   | 2.1                  | 110               | 1.2                                                   | 8.2       | 2.0      |
| PM Q-probe (TAMRA) | 1.9                  | 94                |                                                       | 11        | 4.3      |
| CQ-probe (R6G)     | 1.8                  | 84                | 1.3                                                   | 5.3       | 1.7      |
| PM Q-probe (R6G)   | 1.4                  | 40                |                                                       | 4.4       | 1.2      |

### D Digoxin

|                    | Max response (-fold) | $\Delta$ F.I. (%) | $\frac{\Delta$ F.I.CQ-probe / $\Delta$ F.I.PM Q-probe | EC50 (nM) | LOD (nM) |
|--------------------|----------------------|-------------------|-------------------------------------------------------|-----------|----------|
| CQ-probe (TAMRA)   | *                    | *                 | *                                                     | *         | *        |
| PM Q-probe (TAMRA) | *                    | *                 |                                                       | *         | *        |
| CQ-probe (R6G)     | 1.6                  | 59                | 1.8                                                   | 3.7       | 0.19     |
| PM Q-probe (R6G)   | 1.3                  | 32                |                                                       | 5.4       | 0.43     |

\* not calculated due to R2 values less than 0.96

**Table S5.** Characterization of CQ-probe and PM Q-probe complexes with antibodies against BGP-C7, cortisol, testosterone, and digoxin. An average of three independent measurements is shown.

### A Anti-BGP Fab

|              |          | R-K4 linker         |                     |                     |
|--------------|----------|---------------------|---------------------|---------------------|
|              |          | (GGGS) <sub>0</sub> | (GGGS) <sub>1</sub> | (GGGS) <sub>2</sub> |
| PM-E4 linker | SMA      | 0.28 ± 0.013        | 0.39 ± 0.017        | 0.19 ± 0.020        |
|              | SGS      | 0.21 ± 0.013        | 0.41 ± 0.0098       | 0.12 ± 0.0049       |
|              | SGGG SMA | 0.13 ± 0.0087       | 0.14 ± 0.0065       | 0.14 ± 0.012        |
|              | SGGG SGG | 0.12 ± 0.010        | 0.12 ± 0.0063       | 0.12 ± 0.0040       |

### B Anti-CS IgG

|              |          | R-K4 linker         |                     |                     |
|--------------|----------|---------------------|---------------------|---------------------|
|              |          | (GGGS) <sub>0</sub> | (GGGS) <sub>1</sub> | (GGGS) <sub>2</sub> |
| PM-E4 linker | SMA      | 0.32 ± 0.0037       | 0.44 ± 0.0062       | 0.24 ± 0.0097       |
|              | SGS      | 0.27 ± 0.0048       | 0.35 ± 0.0069       | 0.18 ± 0.0064       |
|              | SGGG SMA | 0.30 ± 0.0065       | 0.25 ± 0.011        | 0.28 ± 0.019        |
|              | SGGG SGG | 0.30 ± 0.0038       | 0.22 ± 0.0029       | 0.21 ± 0.0048       |

### C Anti-TS IgG

|              |          | R-K4 linker         |                     |                     |
|--------------|----------|---------------------|---------------------|---------------------|
|              |          | (GGGS) <sub>0</sub> | (GGGS) <sub>1</sub> | (GGGS) <sub>2</sub> |
| PM-E4 linker | SMA      | 0.86 ± 0.0046       | 0.94 ± 0.012        | 0.93 ± 0.0078       |
|              | SGS      | 0.75 ± 0.011        | 0.83 ± 0.019        | 0.74 ± 0.0068       |
|              | SGGG SMA | 0.77 ± 0.0087       | 0.68 ± 0.024        | 0.85 ± 0.0047       |
|              | SGGG SGG | 0.70 ± 0.0062       | 0.70 ± 0.013        | 0.77 ± 0.014        |

### D Anti-Digoxin IgG

|              |          | R-K4 linker         |                     |                     |
|--------------|----------|---------------------|---------------------|---------------------|
|              |          | (GGGS) <sub>0</sub> | (GGGS) <sub>1</sub> | (GGGS) <sub>2</sub> |
| PM-E4 linker | SMA      | 0.99 ± 0.021        | 1.0 ± 0.0085        | 0.88 ± 0.015        |
|              | SGS      | 0.91 ± 0.019        | 0.84 ± 0.015        | 0.79 ± 0.010        |
|              | SGGG SMA | 0.77 ± 0.015        | 1.1 ± 0.0030        | 0.78 ± 0.022        |
|              | SGGG SGG | 0.73 ± 0.0093       | 1.1 ± 0.0090        | 1.1 ± 0.032         |

**Table S6.** Quenching levels of 12 combinations of CQ-probe using R6G with different linkers mixed with anti-BGP Fab (50 nM), anti-CS IgG (5.0 nM), anti-TS IgG (5.0 nM), and anti-digoxin IgG (10 nM). CQ-probe concentration in all experiments was 1.0 nM. The data represent means ± standard deviation (n = 3).

A BGP-C7

| PM-E4 linker / R-K4 linker  | + Anti-BGP Fab (30 nM) | + BGP-C7 (3.0 $\mu$ M) | Response |
|-----------------------------|------------------------|------------------------|----------|
| SGS/(GGGS) <sub>2</sub>     | 0.13 $\pm$ 0.016       | 1.2 $\pm$ 0.011        | 9.0      |
| SGGGSMA/(GGGS) <sub>0</sub> | 0.16 $\pm$ 0.049       | 1.3 $\pm$ 0.013        | 8.2      |
| SGGGSMA/(GGGS) <sub>1</sub> | 0.18 $\pm$ 0.020       | 1.2 $\pm$ 0.018        | 6.6      |
| SGGGSMA/(GGGS) <sub>2</sub> | 0.13 $\pm$ 0.019       | 1.2 $\pm$ 0.0088       | 9.2      |
| SGGSSGG/(GGGS) <sub>0</sub> | 0.15 $\pm$ 0.063       | 1.2 $\pm$ 0.0055       | 7.9      |
| SGGSSGG/(GGGS) <sub>1</sub> | 0.16 $\pm$ 0.065       | 1.2 $\pm$ 0.011        | 7.3      |
| SGGSSGG/(GGGS) <sub>2</sub> | 0.13 $\pm$ 0.031       | 1.2 $\pm$ 0.0055       | 9.0      |

B CS

| PM-E4 linker / R-K4 linker  | + Anti-CS IgG (5.0 nM) | + CS (1.0 mM)     | Response |
|-----------------------------|------------------------|-------------------|----------|
| SGS/(GGGS) <sub>2</sub>     | 0.24 $\pm$ 0.0034      | 0.87 $\pm$ 0.028  | 3.6      |
| SGGSSGG/(GGGS) <sub>1</sub> | 0.24 $\pm$ 0.031       | 0.82 $\pm$ 0.027  | 3.5      |
| SGGSSGG/(GGGS) <sub>2</sub> | 0.23 $\pm$ 0.076       | 0.83 $\pm$ 0.0051 | 3.6      |

C TS

| PM-E4 linker / R-K4 linker  | + Anti-TS IgG (5.0 nM) | + TS (1.0 $\mu$ M) | Response |
|-----------------------------|------------------------|--------------------|----------|
| SGGGSMA/(GGGS) <sub>1</sub> | 0.57 $\pm$ 0.012       | 1.1 $\pm$ 0.0046   | 1.9      |
| SGGSSGG/(GGGS) <sub>0</sub> | 0.62 $\pm$ 0.0098      | 1.1 $\pm$ 0.020    | 1.8      |
| SGGSSGG/(GGGS) <sub>1</sub> | 0.60 $\pm$ 0.021       | 1.1 $\pm$ 0.025    | 1.8      |

D Digoxin

| PM-E4 linker / R-K4 linker  | + Anti-digoxin IgG (10 nM) | + Digoxin (1.0 $\mu$ M) | Response |
|-----------------------------|----------------------------|-------------------------|----------|
| SGGGSMA/(GGGS) <sub>0</sub> | 0.86 $\pm$ 0.0020          | 1.2 $\pm$ 0.017         | 1.4      |
| SGGSSGG/(GGGS) <sub>0</sub> | 0.83 $\pm$ 0.011           | 1.2 $\pm$ 0.015         | 1.5      |

**Table S7.** Fluorescence responses for selected R-K4 labeled CQ-probes/antibody complexes against BGP-C7, cortisol, testosterone, and digoxin. The data represent means  $\pm$  standard deviation (n = 3).

A

T-K4

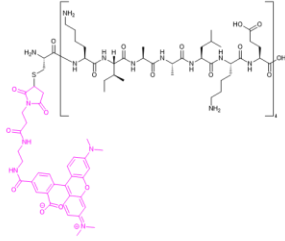

B

R-K4

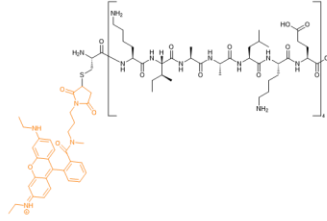

T-GGGS-K4

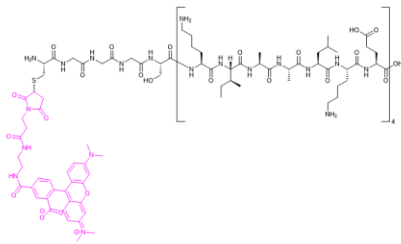

R-GGGS-K4

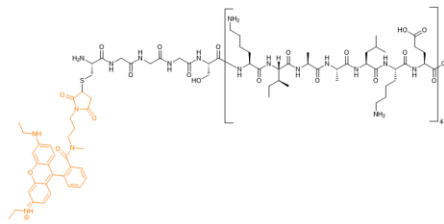

T-GGGSGGGS-K4

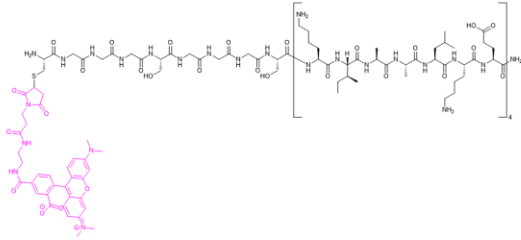

R-GGGSGGGS-K4

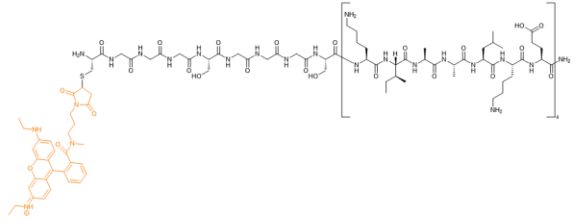

**Figure S1.** The molecular structure of dye-labeled K4 peptides.



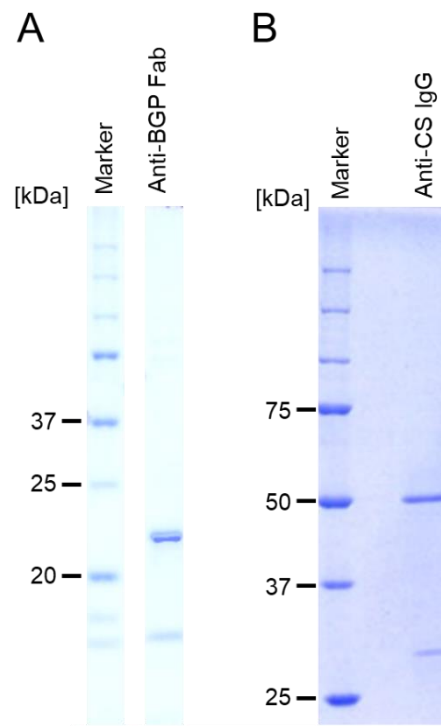

**Figure S2.** SDS-PAGE analysis of purified antibodies. (A) Anti-BGP Fab. (B) Anti-CS IgG.

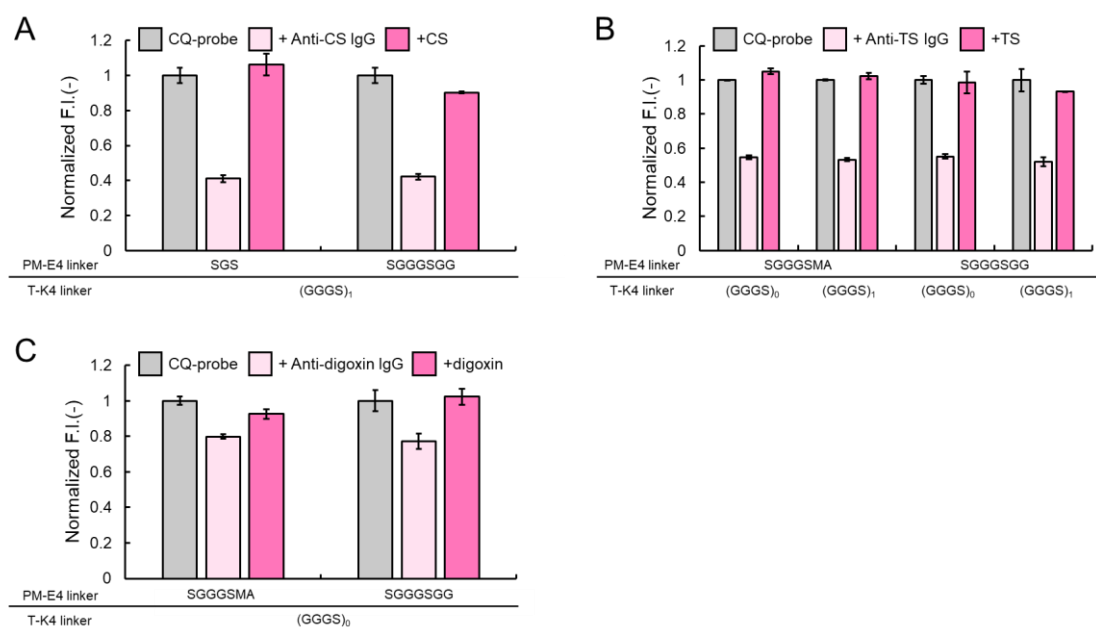

**Figure S3.** Fluorescence responses of selected T-K4 labeled CQ-probe/anti-hapten IgG complexes against antigens. (A) Complex with anti-cortisol IgG (5.0 nM) against cortisol (1.0 mM). (B) Complex with anti-testosterone IgG (5.0 nM) against testosterone (1.0  $\mu$ M). (C) Complex with anti-digoxin IgG (10 nM) against digoxin (1.0  $\mu$ M). CQ-probe concentration in all experiments was 1.0 nM. The data represent means  $\pm$  standard deviation ( $n = 3$ ).

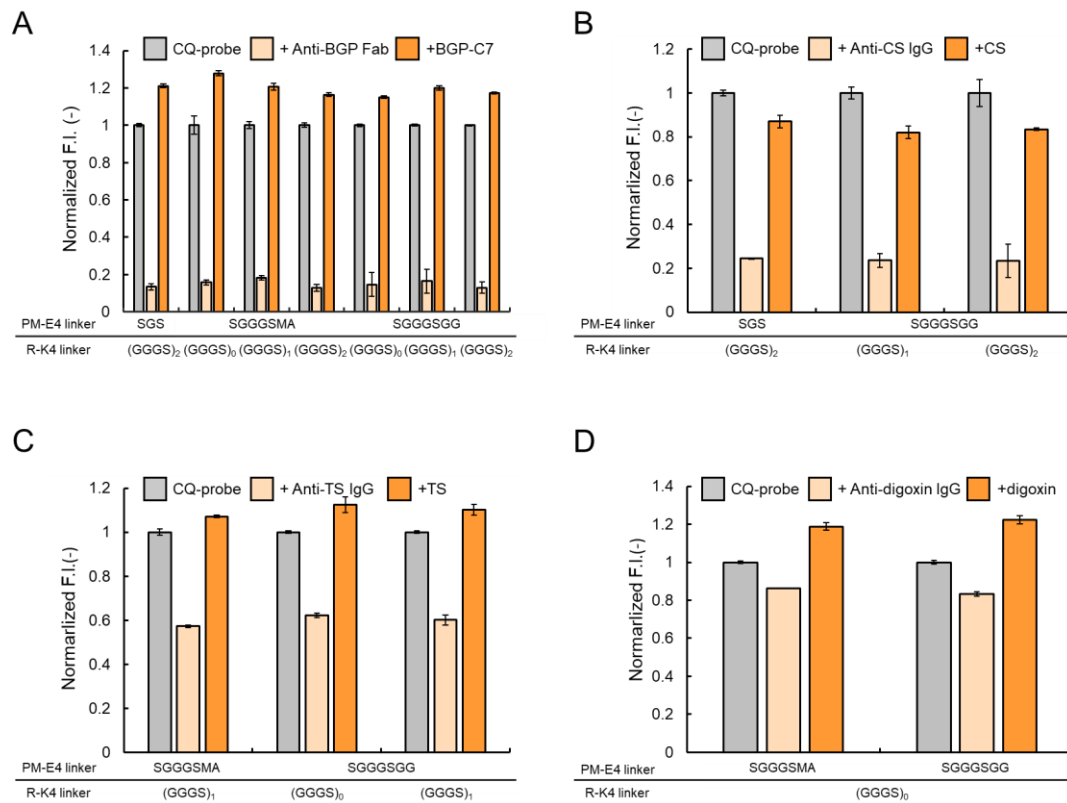

**Figure S4.** Fluorescence responses of selected R-K4 labeled CQ-probe/IgG complexes against antigens. (A) Complex with anti-BGP Fab (30 nM) against BGP-C7 (3.0  $\mu$ M). (B) Complex with anti-cortisol IgG (5.0 nM) against cortisol (1.0 mM). (C) Complex with anti-testosterone IgG (5.0 nM) against testosterone (1.0  $\mu$ M). (D) Complex with anti-digoxin IgG (10 nM) against digoxin (1.0  $\mu$ M). CQ-probe concentration in all experiments was 1.0 nM. The data represent means  $\pm$  standard deviation ( $n = 3$ ).

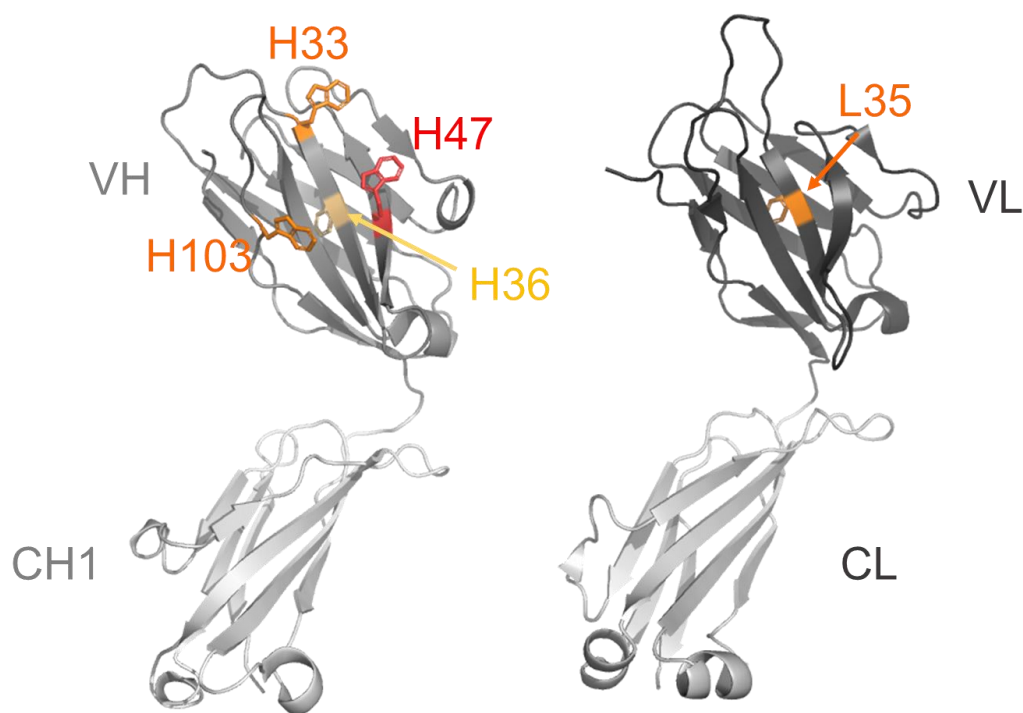

**Figure S5.** The 3D structure of the heavy chain (left) and light chain (right) of anti-BGP Fab, KTM219 (PDB: 5X5X). The sides facing each other in Fab are shown toward this side. The Trp residues were given in different colors depending on their contribution to the fluorescence response. The contribution was based on the percentages of fluorescence response after Phe mutation calculated from descriptions in the previous paper (45% for H47; 55-66% for H33, H103, L35; 84% for H36).<sup>4</sup> The high contribution is red, the moderate is orange, and the low is yellow.

#### Reference

R. Abe, H. Ohashi, I. Iijima, M. Ihara, H. Takagi, T. Hohsaka and H. Ueda, *J. Am. Chem. Soc.*, 2011, **133**, 17386–17394.
